# Supplementary material for: Virtual support for paediatric HIV treatment decision making
Source: PubMed Central journal article supplement (PMC4453589; doi:10.1136/archdischild-2014-307019), 2014-12-30
Supplement: archdischild-2014-307019-s1.pdf [file archdischild-2014-307019-s1.pdf]

**Supplementary Table – regimen referred for simplification**

| <b>Regimen</b>                                        | <b>N (%)</b> |
|-------------------------------------------------------|--------------|
| Kaletra + 2NRTI                                       | 23 (46)      |
| Kaletra + 3NRTI                                       | 12 (24)      |
| Kivexa + boosted PI                                   | 3 (6)        |
| Kivexa, nevirapine                                    | 2 (4)        |
| Kivexa, tenofovir, darunavir/ritonavir, raltegravir   | 1 (2)        |
| Kivexa, tenofovir, etravirine, raltegravir            | 1 (2)        |
| Truvada, darunavir/ritonavir, raltegravir             | 3 (6)        |
| Zidovudine, darunavir/ritonavir, raltegravir          | 2 (4)        |
| Other regimen containing darunavir/ritonavir and NRTI | 3 (6)        |
| <b>TOTAL</b>                                          | <b>50</b>    |

Kaletra: lopinavir/ritonavir; NRTI – nucleoside reverse-transcriptase inhibitor; Kivexa

– abacavir/lamivudine; PI – protease inhibitor; Truvada – emtricitabine/tenofovir
